1           **Rapid reformatting of the cortical code during active tactile**  
2                                   **discrimination**

3

4

5

6

7                   Evan R. Harrell<sup>1,2,\*</sup>, Anthony Renard<sup>1,2</sup>, and Brice Bathellier<sup>1,2\*</sup>

8

9

10

11

12

13

14       <sup>1</sup> Department for Integrative and Computational Neuroscience (ICN)

15       Paris-Saclay Institute of Neuroscience (NeuroPSI)

16       UMR9197 CNRS/University Paris Sud

17       CNRS, Building 32/33, 1 avenue de la Terrasse, 91190 Gif-sur-Yvette, France

18       <sup>2</sup> Institut Pasteur, INSERM, Institut de l'Audition, 63 rue de Charenton, F-75012

19       Paris, France.

20       \* Corresponding authors: [evan.harrell@unic.cnrs-gif.fr](mailto:evan.harrell@unic.cnrs-gif.fr), [brice.bathellier@cnrs.fr](mailto:brice.bathellier@cnrs.fr)

21 **Abstract**

22 Touch-based object recognition relies on perception of compositional tactile features  
23 like roughness, shape, and orientation. However, it remains unclear how the  
24 underlying spatio-temporal information from tactile sensors is integrated to form such  
25 percepts. Here, we establish a barrel cortex-dependent perceptual task in which mice  
26 use their whiskers to discriminate tactile gratings based on orientation. Multi-  
27 electrode recordings in barrel cortex during task performance reveal weak orientation  
28 tuning in the firing rate of single neurons during grating exploration despite high  
29 cortical firing rates. However, population-based classifiers decode grating orientation  
30 in line with concurrent psychophysical measurements and correlate with decisions on  
31 a trial-by-trial basis. For better decoding performance, the precise temporal sequence  
32 of population activity is necessary during grating exploration but becomes  
33 dispensable after decision. Our results suggest that temporal sequences of activity in  
34 barrel cortex carry orientation information during exploration. This code is reformatted  
35 around decision time to make firing rates more informative.

36

## 37 **Introduction**

38           Touch-based object recognition is essential for guiding behavior in a wide  
39 variety of environmental conditions. Reliable recognition generally depends on tactile  
40 search behavior executed with appendages like fingers for humans or the mystacial  
41 vibrissae for rodents<sup>1</sup>. The vibrissae, or whiskers, are rooted on the rodent snout in  
42 densely innervated follicles, where mechano-sensitive cells transduce whisker  
43 bending and contact forces into electrical signals<sup>2</sup>. The resulting sensory information  
44 has spatial (across whiskers) and temporal aspects that are integrated as it passes  
45 through several distinct somatosensory pathways before reaching barrel cortex and  
46 other areas<sup>3</sup>. As the foremost recipient of primary somatosensory thalamic afferents<sup>4</sup>,  
47 barrel cortex is seen as the major cortical hub for the processing of whisker-based  
48 tactile information<sup>5</sup>. However, its precise functional roles remain poorly understood,  
49 as it has been difficult to disentangle the multiplexed encoding of whisker touches  
50 and self-generated movement<sup>6</sup>.

51           Extensive studies on how barrel cortex neurons respond to simple, reliably  
52 targeted whisker stimuli have revealed a somato-topographical code based on high  
53 velocity deflections of one or several whiskers<sup>7</sup>. However, behavioral studies suggest  
54 this simple coding framework is not sufficient to support some of the perceptual  
55 functions of barrel cortex. In head-fixed mice, barrel cortex indispensably encodes  
56 the precise location of an object in a task requiring whisker search behavior<sup>8,9</sup>. This  
57 simple feature, location, is already beyond what a code based purely on velocity can  
58 represent for a single whisker. Although barrel cortex is essential to precisely localize  
59 objects, it is not required to actively detect the presence or absence of objects in the  
60 proximal surroundings<sup>10,11</sup>. This simpler detection process can likely be supported by  
61 other brain areas. In more demanding task conditions like the discrimination of

62 sandpapers<sup>12-15</sup> or in situations that require cognitive planning like whisker-mediated  
63 gap crossing<sup>10</sup>, barrel cortex is once again essential. Taken together, perceptual  
64 studies suggest that barrel cortex is critical for precisely placing and recognizing  
65 tactile objects, especially in conditions that demand spatial and temporal integration  
66 of tactile inputs. The simple coding schemes generated from reliably targeted whisker  
67 stimuli do not shed light on how barrel cortex serves these perceptual processes.

68 To better understand the neural underpinnings of tactile object recognition, it is  
69 thus crucial to study how barrel cortex integrates tactile information across space  
70 (whiskers) and time to encode segregating tactile features. In this pursuit, many  
71 studies have focused on how the coarseness of anisotropic surface textures  
72 (sandpapers) is encoded during exploration with one or a few whiskers<sup>12-16</sup>. These  
73 studies have suggested that object coarseness is encoded by temporal integration of  
74 whisker slip events, with higher rates of slip events causing higher firing rates in  
75 barrel cortex<sup>15-18</sup>. While these studies have given important insights, coarseness is  
76 just one feature that can differ between objects. Along with variations in coarseness,  
77 natural objects also exhibit unique combinations of large-scale isotropic features,  
78 which means they can be decomposed into an arrangement of oriented surfaces.  
79 While it is documented that rats can discriminate oriented tactile gratings with their  
80 whiskers<sup>19</sup>, it is not known if and how information about grating orientation is encoded  
81 in barrel cortex during active sensation. To study this, we developed a barrel cortex-  
82 dependent Go/NoGo task in which head-fixed mice discriminate tactile gratings  
83 based on orientation with their whiskers. Multi-electrode recordings during task  
84 performance revealed that during peak cortical firing rates in the early phase of  
85 grating exploration, few single neurons showed any orientation selectivity. However,  
86 support vector machine (SVM) classifiers based on the time course of population

87 activity in this period decoded the orientation category in line with concurrent  
88 psychophysical measurements. Examination of hit, false alarm, and correct rejection  
89 trials indicated that when the mice correctly classified the grating, decoders based on  
90 the barrel cortex activity also performed best at discriminating the gratings, and this  
91 could not be explained only by differences in licking behavior that are inherent in the  
92 Go/NoGo paradigm. As decisive licking ensued, single neuron firing rates became  
93 more informative. These results suggest that orientation information is first encoded  
94 by a temporal sequence of population activity in barrel cortex, which reflects the  
95 gathering of information associated with active object search. Then, as decision  
96 nears, higher level processing makes single neuron firing rates more informative.

97

## 98 **Results**

### 99 **Mice categorize texture gratings based on orientation**

100 It has recently been shown that freely moving rats can discriminate the  
101 orientation of tactile gratings with their whiskers<sup>19</sup>. To investigate if mice are also able  
102 to perform this discrimination, we trained head-fixed, water-deprived mice (**Fig. 1a**,  
103 **Supplementary Fig. 1**) to report the perceived orientation of a tactile grating by  
104 licking a tube to receive a water reward. The oriented gratings were presented in full  
105 dark conditions using a linear stage, and on some days all whisker interactions with  
106 the gratings were filmed with a high-speed infrared video camera (see Methods). For  
107 each trial, after no licking was detected on the reward port for at least 3 seconds, a 2  
108 kHz sound was played to signify trial onset and a grating was translated into reach of  
109 the right whisker field (**Fig. 1b**). After a 1 second period of interaction with the grating,  
110 mice reported the orientation of the grating by either licking to obtain a water reward  
111 (Go trial) or refraining from licking to avoid punishment (**Fig. 1b**). In these trial

112 conditions, mice were trained to perform a simple Go/NoGo discrimination between a  
113 vertically oriented grating ( $90^\circ$ ) and a horizontal grating ( $0^\circ$ ), with Go and NoGo  
114 stimulus types interchanged in different groups of animals (**Supplementary Fig. 1**  
115 and Methods for all training details). After performance of simple Go/NoGo  
116 discrimination stabilized above 70% correct across 2 days, intermediate orientation  
117 angles spaced by  $9^\circ$  were gradually introduced and reinforced (**Fig. 1b**, see  
118 Methods). In this psychometric version of the task, the boundary between rewarded  
119 and non-rewarded orientations was  $45^\circ$ , and the fully ambiguous orientation was  
120 never presented.

121 From the beginning of simple Go/NoGo ( $0^\circ$  vs.  $90^\circ$ ) training, mice quickly  
122 learned the appropriate time to lick and after 10-15 days (~2000 trials), they easily  
123 discriminated between orthogonal grating orientations as measured by their licking  
124 behavior (**Fig. 1c**). Improved performance across time was mostly attributable to  
125 refraining from licking for the NoGo stimuli (**Fig. 1c**). After progressing to the  
126 psychometric version of the task, the ongoing motivational state of the animal, driven  
127 by thirst, determined whether False Alarm or Miss errors were more common. In  
128 most animals, we observed a more gradual change in licking behavior across  
129 orientation steps for NoGo than for Go orientations (**Fig. 1d**, lick histograms). Along  
130 with this, mice tended to make more False Alarm errors than Miss errors (**Fig. 1d**)  
131 indicative of a strategy aiming to minimize reward loss. This strategy results in  
132 asymmetric psychometric functions (**Fig. 1d**). To balance these curves<sup>20</sup>, we  
133 averaged across animals in which the Go and NoGo orientations had been  
134 interchanged, and this revealed that the discrimination performance controlled for  
135 motivation is almost perfectly symmetric (**Fig. 1d**). These results confirm that like

136 rats<sup>19</sup>, mice can discriminate tactile gratings using only their whiskers, and they do so  
137 with high acuity.

138

### 139 **Barrel cortex is essential for discriminating oriented gratings**

140 After establishing that mice can discriminate oriented gratings with their  
141 whiskers, we asked if barrel cortex is essential to perform the simple Go/NoGo  
142 version of this task. Optogenetic manipulations can perturb performance even if a  
143 brain area is dispensable<sup>11</sup>, so we opted for a barrel cortex lesioning strategy. Mice  
144 were trained in the simple Go/NoGo version of the task until they reached stable  
145 performance above 70% correct across 2 days, after which thermo-coagulation  
146 lesions<sup>21</sup> were applied over the entire contralateral postero-medial barrel field (**Fig.**  
147 **2a, Supplementary Fig. 2**). As a control, another group of animals (sham group)  
148 underwent mock surgeries that involved the same duration of anesthesia, a large  
149 craniotomy over barrel cortex, and the same process to reseal the exposed brain but  
150 with no lesion. The day after surgery, both lesion and sham groups performed the  
151 simple Go/NoGo task at chance levels (**Fig. 2b**), indicating that the general  
152 aftereffects of surgery and craniotomy have an impact on performance. Over the  
153 ensuing days, the sham group steadily recovered performance, while the lesioned  
154 group continued to perform at chance levels (**Fig. 2b**). Lesions were examined post  
155 hoc in coronal sections to assure that all postero-medial barrels (straddlers, A1-E4) in  
156 the whisker region of the primary somatosensory cortex had been removed  
157 (**Supplementary Fig. 2**).

158 Barrel cortex lesions are known to affect whisker movement control<sup>11,22</sup>.  
159 Therefore, we examined high-speed videos of whisker movements executed by the  
160 animals during task performance in sham and lesion groups. To quantify global

161 whisker movements throughout a trial, we defined the whisking envelope as the  
162 rectified and smoothed centroid velocity of the binarized whisker image within a  
163 manually traced ROI around the whisker bases (**Fig. 2c**, See Methods). This  
164 envelope showed that whisking behavior is most pronounced between trial onset  
165 (trial start sound cue) and the time when the grating is fixed and within reach of the  
166 whiskers (**Fig. 2d**). Surgery affected the average whisking envelope in both sham  
167 and lesion groups of animals, as quantified by the total whisking at trial onset (**Fig.**  
168 **2e**, area under the whisking envelope curve). By day 3 after surgery, the total  
169 whisking of both groups returned to pre-surgical levels, but the behavioral  
170 performance recovered only in the sham group. Therefore, the drop in task  
171 performance after lesion cannot be explained by deficiencies in global whisker  
172 control. Barrel cortex removal also did not impact performance by abolishing licking.  
173 On day 3 after surgery, hit rates and false alarm rates were equal in the lesioned  
174 animals (both at ~50%), indicating that mice randomly licked rather than never licking  
175 at all, which would both produce chance level performance (**Fig. 2f**). These results  
176 indicate that intact barrel cortex is required to discriminate grating orientations with  
177 the whiskers, and this cannot be explained by changes in global whisker search  
178 behavior or licking ability.

179

### 180 **Discrimination performance correlates with exploratory whisking and** 181 **increased barrel cortex spiking activity**

182 To study the encoding of grating orientation in mouse barrel cortex during  
183 active discrimination, we made acute extracellular recordings (9 recordings, 74 single  
184 unit and 274 multi-units) during the psychometric Go/NoGo version of the task (**Fig.**  
185 **3a, Supplementary Fig. 3**). Silicon probes with linearly spaced electrodes (spanning



186 775  $\mu\text{m}$ ) were lowered to 1 mm depth from the surface of the contralateral barrel  
187 cortex (targeted C2 whisker A/P: -1.5mm, M/L: 0/3.3mm). Electrode placement in the  
188 barrel cortex was histologically verified in tangential sections after the experiments  
189 (**Supplementary Fig. 3**), and most of the active cells that were recorded resided in  
190 deeper layers (**Supplementary Fig. 3**). All recorded mice showed stable task  
191 performance above 70% correct on the day before the recording, but only some of  
192 them went on to perform during the recording (n=5 discriminating mice), while others  
193 did not (n=4 non-discriminating mice). This is likely due to the anesthesia, durotomy,  
194 and electrode descent preceding behavioral measurements in these acutely recorded  
195 animals.

196 In an example hit trial from a discriminating animal (**Fig. 3b**), the mouse  
197 initiated whisking before the grating came into reach and spiking activity increased  
198 once the grating was close enough to touch the whiskers. After ~500 ms of  
199 exploration, the mouse decided to lick and received a water reward, which triggered  
200 prolonged licking. In an example correct rejection trial (**Fig. 3c**), the same mouse also  
201 whisked into the grating, which produced spiking activity in the last ~250 milliseconds  
202 before the grating stabilized at its fixed position in reach. Then, the mouse correctly  
203 withheld licking to avoid punishment. This same behavioral sequence was apparent  
204 when averaging across all trials in this animal (**Fig. 3d**) or across all discriminating  
205 animals (**Fig. 3e**). As the grating approached the mice, they executed whisker search  
206 behavior, which was followed by a burst of spiking activity in barrel cortex neurons  
207 that peaked just before the grating stopped near the snout. Licking was initiated after  
208 the grating stopped and became discriminative ~590 ms after the peak of population  
209 activity (**Fig. 3e**). After the decision to lick, low whisking levels were maintained and,

210 in some mice, a rebound of whisking and barrel cortex activity was observed when  
211 the texture moved out of reach (**Fig. 3e**).

212 These patterns of behavior were much less discernible in animals that did not  
213 discriminate the gratings during the recording (**Fig. 3f-g**). In these animals, licking  
214 was initiated earlier, even before the grating came to a halt, indicating that their  
215 choice behavior did not take the grating into account. Whisking levels and spiking  
216 activity were also reduced, especially during the early interactions with the grating.  
217 However, the population firing rates still peaked just before the grating arrived at its  
218 fixed position, suggesting that there could be orientation-related information present  
219 in the barrel cortex at that time point even if these animals did act on it. These data  
220 indicate that patterned behavior and spiking activity in barrel cortex are associated  
221 with task performance.

222

### 223 **Temporal decoders reproduce psychophysical measurements and outperform** 224 **rate decoders during object search**

225 We next quantified the information about grating orientation that is present in  
226 sample populations of barrel cortex neurons during task performance. To do this, we  
227 trained support vector machine (SVM) classifiers using a leave-one-trial-out cross-  
228 validation procedure for each mouse based on the activity of simultaneously recorded  
229 single and multi-units (**Fig. 4a**). The classifiers were then applied to decode the  
230 orientation category of the left-out trial ( $>45^\circ$  or  $<45^\circ$ ), and this procedure was  
231 repeated until every trial had been left-out. Because tactile inputs occur in a series of  
232 multi-whisker contacts that evoke dynamic cortical responses, we examined whether  
233 a temporal code was present by basing the classifiers on population vectors  
234 spanning 5 consecutive 100 ms time bins of spiking activity (**Fig. 4a**). To assess the

235 contribution of spike timing, we also trained classifiers with a single 500 ms bin (**Fig.**  
236 **4b**, average firing rate). At trial onset, there was no information about grating  
237 orientation in the barrel cortex spiking activity and both types of classifiers performed  
238 at chance levels (50%). As the texture moved into range of the whiskers,  
239 performance improved rapidly for the temporal decoders, and sluggishly for the  
240 average firing rate decoders (**Fig. 4a-b**). This improvement happened well before  
241 discriminative licking for the temporal decoders (**Fig. 4a-b**), and therefore cannot be  
242 related to lick-induced whisker movements against the gratings. The elevated early  
243 performance of temporal decoders was consistent across many bin sizes that could  
244 be chosen for the population vectors (**Supplementary Fig. S4**, 50 ms and 25 ms).

245         If the grating orientation information encoded in barrel cortex is relevant for  
246 orientation perception, the decoders should produce neurometric functions that  
247 resemble the psychophysics exhibited by the animals. To check this, we computed  
248 classifier neurometric functions by examining performance across grating orientation  
249 angles (**Fig. 4c**). In the 500 ms period before discriminative licking (See Methods),  
250 which we defined as the early period (always portrayed in blue comprising the end of  
251 whisker search, which is shown in pale blue), the temporal decoders generated  
252 neurometric functions that were more similar to the psychometric behavior than the  
253 average firing rate decoders (**Fig. 4c left**). After feedback in the form of reward or  
254 punishment (late period), both types of decoders performed equally well in matching  
255 the psychometric behavior (**Fig. 4c right**). To confirm the temporal nature of the code  
256 while controlling for the number of dimensions in the classifiers, we shuffled the  
257 temporal order of the population vector bins for the tested trial and examined how  
258 that affected classifier performance. The correct bin order had a clear advantage  
259 during the early period, but during the late period temporal shuffling had no effect on

260 classifier performance (**Fig. 4d**). Shuffling the cell identities in the same fashion  
261 abolished almost all classifier performance at any time relative to trial onset,  
262 indicating that unit identity is also important for grating orientation encoding (**Fig. 4d**).

263 Another way to verify that spike timing is important during the early period is to  
264 vary the training and testing times of the classifiers and observe how the shifts  
265 degrade the classifier performance. We trained temporal decoders at one time point  
266 and tested them at all other time points. During the early period, small misalignments  
267 in time completely abolished the decoding power of the classifiers (**Fig. 4e, left**)  
268 indicative of a code in which latency and/or temporal sequences are paramount.  
269 During the late period, the classifier was much more robust to time shifts indicating a  
270 more stable code, consistent with the decreased role of temporal information in this  
271 period. Taken together, these analyses suggest that at the onset of object search,  
272 information about grating orientation is present in the temporal sequence of  
273 population activity, and with time this code stabilizes into a firing rate code. These  
274 relationships do not hold in animals that do not discriminate the gratings (**Fig. 4e**).  
275 Along with highlighting the increased performance of temporal decoders during  
276 search behavior, these results affirm that the activity in barrel cortex encodes  
277 information about grating orientation.

278

279 **Orientation tuning is weak at the onset of barrel cortex spiking responses but**  
280 **increases as licking sets in**

281 While population-based classifiers can quantify the grating orientation  
282 information present across sample populations of barrel cortex neurons, they do not  
283 shed light on if and how single cells or small groups of cells encode grating  
284 orientation. Looking at some single unit activity, some discharged many spikes at the

285 onset of whisker interactions with the grating, and their firing rates then adapted  
286 when the grating reached its fixed position (**Fig. 5a, Supplementary Fig. 3**, Single  
287 Unit 1). Other neurons had less pronounced onset responses, but still had elevated  
288 firing rates while the grating was within reach (**Fig. 5a, Supplementary Fig. 3**, Single  
289 Unit 2). To quantify these responses, we constructed orientation tuning curves in 500  
290 ms windows at different latencies with respect to trial onset (**Fig. 5b, Supplementary**  
291 **Fig. 5**, blue-magenta gradient). Tuning curves were computed for single units and  
292 multi-units by summing the spikes within a 500 ms window of interest for each trial of  
293 a given orientation, then dividing the total number of spikes for each trial by the size  
294 of the window (500 ms) (**Fig. 5b, Supplementary Fig. 5**, 6 examples). The mean  
295 and standard deviation of these firing rates across trials for Single Unit 1 (same unit  
296 as **Fig. 5a** top) showed little selectivity for grating orientation during the peak firing of  
297 the early response (**Fig. 5b** top left, blue) or the late period after discriminative choice  
298 (**Fig. 5b** top left, magenta). To assess tuning significance, we expressed the tuning  
299 curves in polar form and compared the magnitude of the vector sum to the vector  
300 sums obtained from shuffling the trial labels 200 times (**Fig. 5b** bottom left). If the  
301 actual tuning vector was further away from the mean of the shuffles than 95% of the  
302 shuffles, it was considered significant (False positive rates 5%). For Single Unit 2  
303 (same unit as **Fig. 5a** bottom), orientation tuning was significant according to our  
304 shuffling procedure (**Fig. 5b** right). This unit had delayed responses compared to the  
305 peak of population activity that occurred just before the grating halted within range of  
306 the whiskers. The orientation tuning originated in the second 500 ms time bin after  
307 the start of the search period, and it persisted through discriminative choice and  
308 feedback. Examining the orientation tuning across time for all single and multi-units,  
309 we found that tuning was not above chance levels during the peak of firing that

310 occurs just before grating halt, and started to appear in the short period between  
311 grating halt and discriminative licking (**Fig. 5c**). Temporal decoders already have  
312 performance above chance and average firing rate decoders perform poorly during  
313 this period (**Fig. 4b-c**). These analyses suggest that during object search, information  
314 about grating orientation is not well-encoded by the firing rate of single neurons.  
315 Rather, it begins in a dynamic temporal sequence of population activity in barrel  
316 cortex associated with peak cortical firing rates, after which orientation tuning builds  
317 up as discriminative licking sets in. In non-discriminating animals, there are fewer  
318 responsive cells in barrel cortex and also much fewer tuned cells in all periods (**Fig.**  
319 **5c** bottom right). Taken together, these results suggest that early responses  
320 represent information about orientation at the population level and depend on the  
321 timing of spikes. Later, orientation tuning increases and single neuron firing rates  
322 become more informative, and this transformation likely requires downstream  
323 temporal integration.

324

### 325 **Barrel cortex activity encodes trial outcome for correct decisions on a trial-by-** 326 **trial basis controlling for licking**

327 An important final step in establishing a link between barrel cortex activity and  
328 orientation perception is to show that the barrel cortex encoding varies along with the  
329 animal's choices on a trial-by-trial basis. This can be done by examining the barrel  
330 cortex encoding across different trial outcomes, which in our case were Hits, Misses,  
331 False Alarms and Correct Rejections (**Fig. 6a**, example animal). Because most  
332 animals performed very few Misses, we concentrated on Hit, False Alarm, and  
333 Correct Rejections for this analysis (**Fig. 6b**, example animal). Looking at a single  
334 discriminating mouse, the trial-averaged whisking envelopes and population firing

335 rates differed across time for different trial outcomes (**Fig. 6a-b**). When examining the  
336 cortical activity in this animal using principal components analysis (PCA), Hits and  
337 Correct Rejections showed some segregation in the space defined by the first 3  
338 principal components. However, the False Alarms seemed to be less clustered in the  
339 space during both the early and late periods (**Fig. 6b** right). When averaging across  
340 all discriminating animals, differences in whisking behavior and population spiking  
341 activity were negligible in the early grating interaction, however there was increased  
342 whisking and increased barrel cortex activity after punishment for False Alarms (**Fig.**  
343 **6c**). We used the temporal decoders to examine if False Alarms were less discernible  
344 from Hits based on the cortical activity alone in the early period, which would be  
345 indicative that the cortical activity is relevant for orientation perception. Temporal  
346 decoders performed much worse in the early period at decoding the orientation  
347 category in Hit vs. False Alarm trials than they did for Hit vs. Correct Rejection trials  
348 (**Fig. 6d**). One explanation for this is that licking alone could drive the cortical  
349 neurons via induced whisker movements against the gratings, and the classifiers use  
350 this information to decode. If this was the case, the classifiers should also  
351 discriminate between False Alarms and Correct Rejections of a fixed stimulus,  
352 because in this situation only the licking behavior is different and not the stimulus.  
353 However, temporal decoders also performed much worse at discriminating False  
354 Alarms vs. Correction Rejections for matched stimuli than they did for discriminating  
355 Hits vs. Correct Rejections (**Fig. 6e**). There was an elevated baseline for  
356 discriminating False Alarms vs. Correct Rejections that could be related to task  
357 engagement, but after controlling for this baseline there was significantly less  
358 decoding in the early period than there was for Hits vs. Correction Rejections. In  
359 summary, on trials where the mice discriminate the gratings (HvCR), decoders also

360 performed best at discriminating the gratings (better than HvFA or FAvCR). These  
361 analyses thus establish a trial-by-trial link between discrimination in the barrel cortex  
362 population activity and correct decisions.

363

## 364 **Discussion**

365 We have shown that, like freely moving rats<sup>19</sup>, head-fixed mice can be trained  
366 to discriminate tactile gratings based on orientation using only their whiskers (**Fig. 1**),  
367 and this perceptual process is barrel cortex-dependent (**Fig. 2**). The recognition of  
368 isotropic tactile features like orientation have received considerably less attention in  
369 whisker studies than texture-based features such as the coarseness of  
370 sandpapers<sup>12–16,23</sup>. However, there is evidence from behavioral studies in rodents  
371 that form-related tactile cues can also be used by animals to guide behavior<sup>19,24</sup>.  
372 Therefore, the establishment of perceptual tasks such as the discrimination of grating  
373 orientation, three-dimensional bar orientation<sup>25</sup>, or surface concavity<sup>26</sup> will open up  
374 new lines of inquiry into the neural underpinnings of tactile object recognition. These  
375 new behavioral paradigms will be important to understand how different tactile inputs  
376 that are spread across space and time can be integrated to form a holistic tactile  
377 experience. As a proof of principle, from the coarseness studies in rodents and  
378 primates, a general motion-based mechanistic theory was postulated<sup>1</sup> that relied on  
379 temporal integration of sensor micromotions. These similarities likely extend to other  
380 tactile qualities, so the development of new tasks across different species is of broad  
381 interest.

382 To perform grating orientation discrimination in head-fixed conditions, mice  
383 need to execute a sequence of appropriate behaviors, much like humans do in object  
384 manipulation tasks<sup>27</sup>. The first action is to detect the incoming grating. In this pursuit,



385 we found that discriminating mice whisked vigorously when the grating was  
386 approaching (**Fig. 3**), which generated dynamic responses in barrel cortex neurons  
387 (**Figs. 3, 5a**). This anticipatory whisking behavior has also been reported during  
388 sandpaper discrimination in head-fixed mice<sup>12,13</sup>. Freely moving rodents also use  
389 goal-directed head movements along with exploratory whisking to perform tactile  
390 search<sup>28</sup>, so the level of vigorous whisking observed here might be an adaptation to  
391 head-fixed task conditions. Once the approaching grating is localized, the mice must  
392 then refine their search behavior to adaptively sample the stimulus. During this  
393 period, the first traces of orientation tuning begin to appear in single neurons in the  
394 barrel cortex population (**Figs. 4-6**). Our results suggest that during detection and  
395 then search refinement, barrel cortex implements a flexible representation of grating  
396 orientation that starts as a temporal code, and as search is refined and decisive  
397 action is taken, stabilizes into a firing rate code. In the early grating interaction,  
398 temporal decoders outperformed rate decoders and mirrored concurrent  
399 psychophysical measurements (**Fig. 4**). Single neuron orientation tuning was rare  
400 and increased as licking set in (**Fig. 5**). This transformation from temporal to rate  
401 coding might depend on higher cortical areas or thalamocortical loops<sup>29</sup> that support  
402 information accumulation as the mouse interacts with the stimulus. Evidence  
403 accumulation models have recently been employed to study sandpaper  
404 discrimination in freely moving rats<sup>18</sup>. To apply these models to sandpaper  
405 discrimination, downstream processing beyond primary and secondary  
406 somatosensory cortex was postulated to integrate the information across volleys of  
407 incoming sensory information, each volley associated with a pump of the whiskers  
408 into the stimulus. Posterior parietal cortex (PPC) is an area downstream that might be  
409 the locus of this temporal integration. Electrophysiological recordings in PPC during

410 grating orientation discrimination in rats revealed that choice-related activity is  
411 present in single neurons<sup>19</sup>, as well as graded orientation tuning similar to what we  
412 found in barrel cortex neurons (**Fig. 5, Supplementary Fig. 5**). The fine connectivity  
413 between PPC and the primary and secondary whisker areas is not well-documented  
414 but could provide blueprints on which to establish mechanistic models for tactile  
415 evidence accumulation, refinement, and decision.

416         The final action that the mouse needs to take after detection and search  
417 refinement is discriminative choice. When we examined orientation encoding by trial  
418 outcome instead of only by stimulus orientation, we found that false alarms were less  
419 distinguishable from Hits than Correct Rejections just before discriminative licking,  
420 and this could not be explained by differences in licking behavior alone (**Fig. 6**).  
421 Taken together, these observations indicate that the discriminability of the early  
422 temporal code in the barrel cortex mirrors the choice behavior of the animal on a trial-  
423 by-trial basis. Another report looking at the mouse's ability to detect single whisker  
424 deflections also found that barrel cortex neurons responded differently for different  
425 trial outcomes<sup>30</sup>. However, detection of a single whisker sinusoidal stimulus can be  
426 coded simply as the presence or absence of activity, and other studies have found  
427 that this kind of detection can be performed and even learned in the absence of  
428 barrel cortex<sup>10,11</sup>. Grating orientation is a tactile feature on a much different scale than  
429 the sinusoidal vibration of a single whisker, and the temporal population code that we  
430 uncover likely reflects the combination of grating contacts across whiskers and time,  
431 which is the raw information that needs to be integrated in order to recompose the  
432 orientation of the grating. The necessity of barrel cortex to discriminate gratings  
433 based on their orientation indicates that this integration relies on barrel cortex, and  
434 barrel cortex is dispensable for object detection. The fact that perceptual decisions

435 are predicted on a trial-by-trial basis by barrel cortex activity is in line with its causal  
436 involvement and indicates that significant transformation of the raw stimulus  
437 information is occurring from whiskers to cortex in this case, which is not the case in  
438 detection tasks.

439 In summary, our results establish a cortex-dependent tactile discrimination  
440 task in which the fine temporal dynamics of neural activity are informative, and  
441 precisely define the timeline on which the temporal information is integrated to form a  
442 percept. There is much to learn about the circuits that are responsible for this multi-  
443 contact temporal integration and how they contribute to tactile object recognition.

444

## 445 **Acknowledgements**

446 This work was supported by the Paris-Saclay University (Lidex NeuroSaclay) and by  
447 the International Human Frontier Science Program Organization (CDA-0064-2015, to  
448 BB). AR is supported by the Fondation pour la Recherche Médicale  
449 ECO20170637482. Valérie Ego-Stengel and Isabelle Férézou gave insightful advice  
450 and feedback. The authors thank Guillaume Hucher for performing the histology and  
451 Aurélie Daret for providing the animal care for the mice.

## 452 **Author contributions**

453 EH built the experimental setup, developed the behavioral task, carried out  
454 behavioral experiments and electrophysiological recordings, did analysis, prepared  
455 the figures and wrote the manuscript. AR did behavioral experiments, analysis, and  
456 edited the manuscript. BB led the project, oversaw the analysis, and wrote the  
457 manuscript.

## 458 **Declaration of Interests**

459 The authors declare no competing interests.

460

461 **Figures**

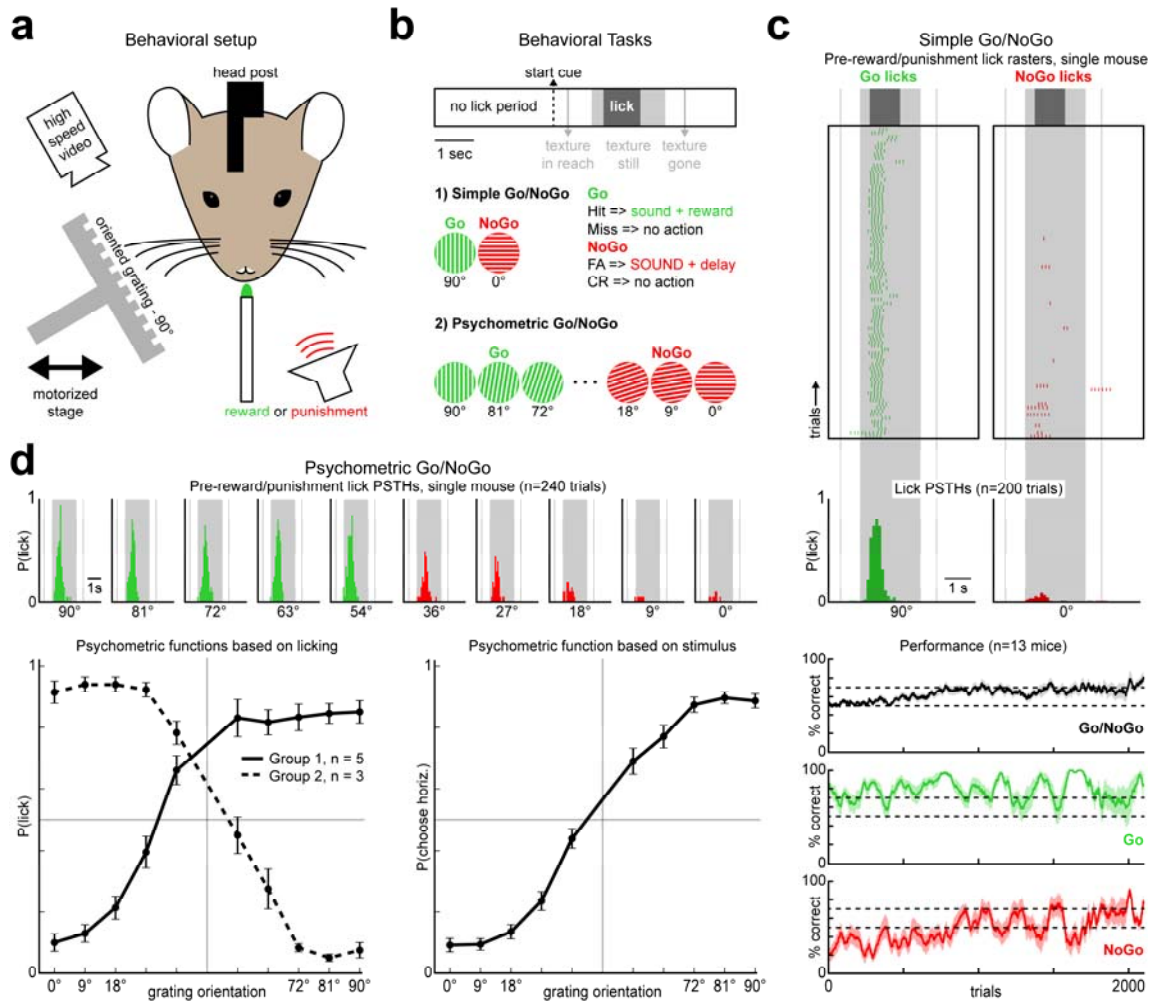

462

463 **Figure 1 | Mice categorize texture gratings based on their orientation.** **a.** A  
 464 schematic showing the behavioral setup. **b.** Task parameters for (1) simple Go/NoGo  
 465 discrimination and (2) psychometric Go/NoGo grating orientation discrimination tasks.  
 466 **c.** Top: Lick raster from simple Go/NoGo discrimination between vertical (90°) and  
 467 horizontal (0°) gratings. Middle: Lick probabilities from one session of simple  
 468 Go/NoGo discrimination. Bottom: Mean learning curves (shaded areas are s.e.m.,  
 469 n=13 animals) for All (black), Go (green), and NoGo trials (red). **d.** Top: Lick  
 470 probabilities from one session of psychometric Go/NoGo discrimination. Bottom left:  
 471 Psychometric functions for two groups of mice where the Go/NoGo rules were

472 interchanged. Bottom right: The psychometric functions controlled for motivation  
 473 (error bars are s.e.m.).

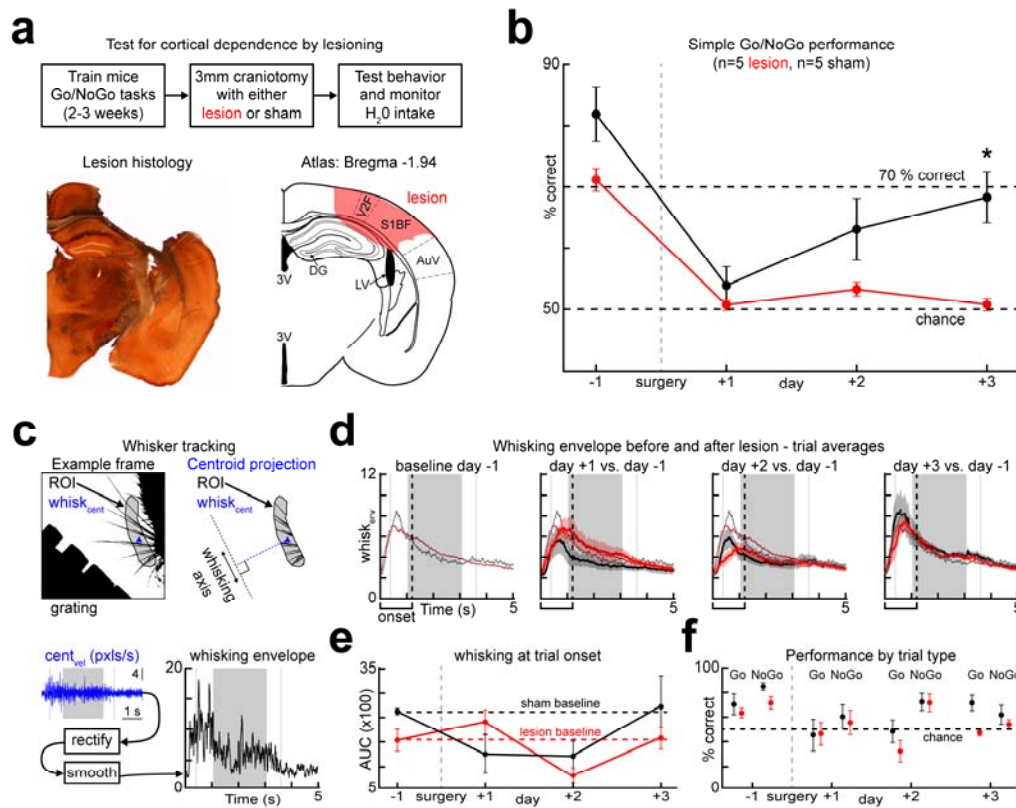

474

475 **Figure 2 | Barrel cortex is required for discriminating oriented gratings. a. Top:**

476 Experimental approach and timeline. Bottom left: An example barrel cortex lesion.

477 Bottom right: the corresponding slice in the brain atlas. Abbreviations: third ventricle

478 (3V), dentate gyrus (DG), lateral ventricle (LV). **b.** Simple Go/NoGo discrimination

479 performance before and after surgery in lesion and sham groups ( $p=0.0056$ ,

480 bootstrap resample test). **c.** Whisker tracking during performance of the task. Top

481 left: A binarized frame. Top right: A manually selected region of interest (ROI)

482 containing the bases of the whiskers and the centroid (blue). Bottom left: the velocity

483 of the centroid plotted across a trial. Bottom right: the resulting whisking envelope

484 after rectification and smoothing. **d.** Top: Average whisking envelopes across days

485 for lesion and sham groups. **e.** Area under the curve (AUC) during the whisker search

486 period across days for lesion and sham groups. **f.** Performance broken down by trial  
 487 type for lesion and sham groups.

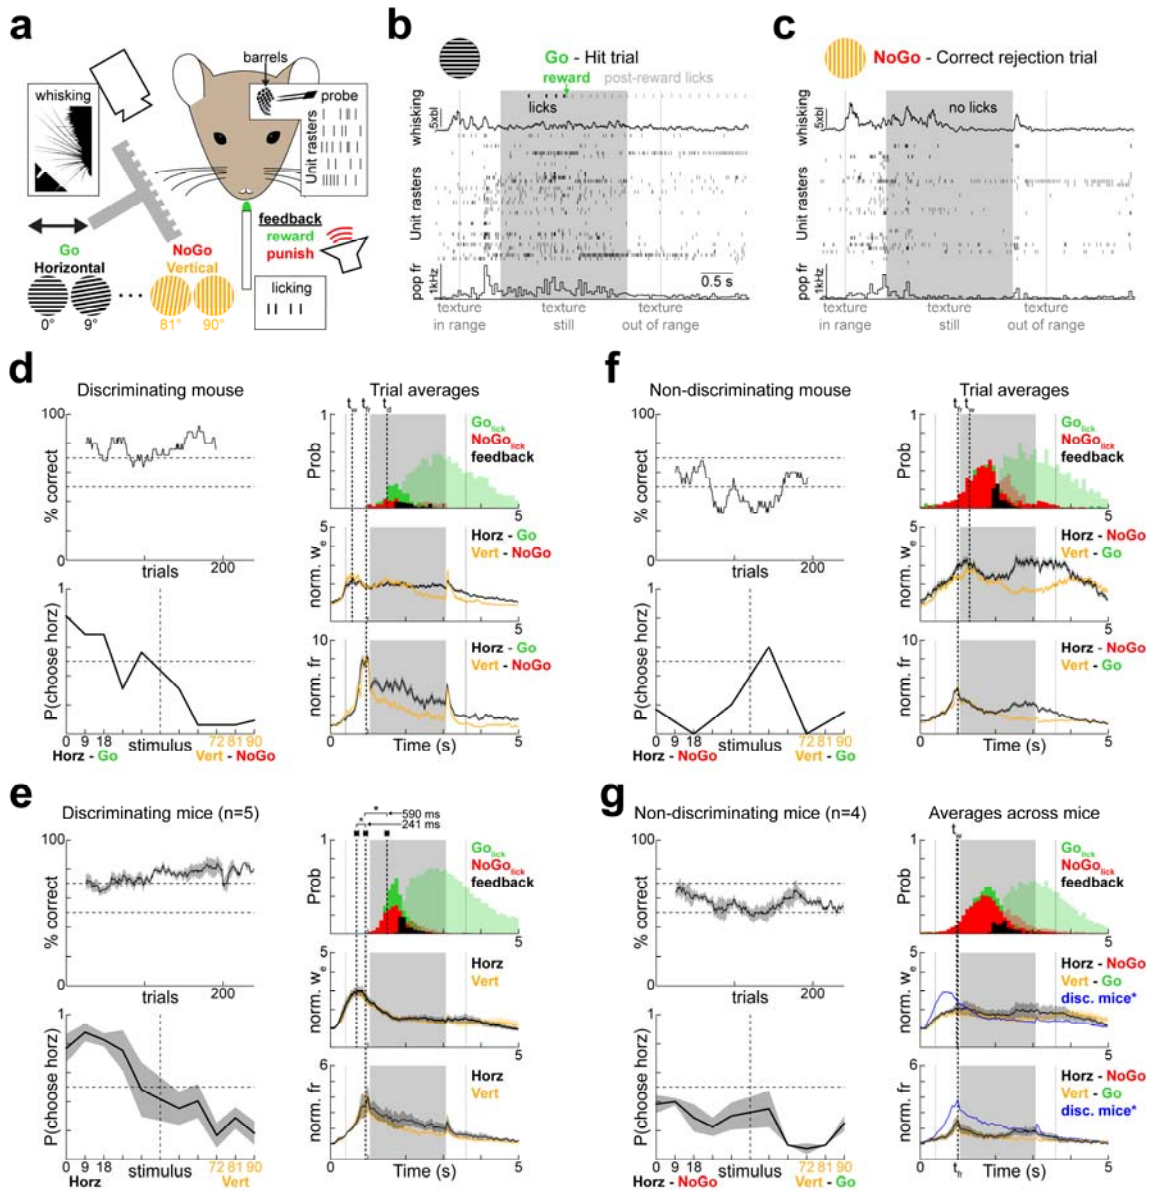

488

489 **Figure 3 | Discrimination performance correlates with exploratory whisking and**  
 490 **increased barrel cortex spiking activity.** **a.** A schematic of the recording setup. **b.**  
 491 An example hit trial showing licks, reward, whisking, and unit rasters. **d.** Same as B  
 492 for a correct rejection trial. **d-e.** Performance across trials, psychometric functions,  
 493 licking, whisking, and total population spiking activity for a discriminating mouse (d) or



494 5 discriminating mice (e). Shaded lick histograms are licks after reward/punishment.

495 Shading around curves is s.e.m. **f-g**. Same as d-e but for non-discriminating mice.

496



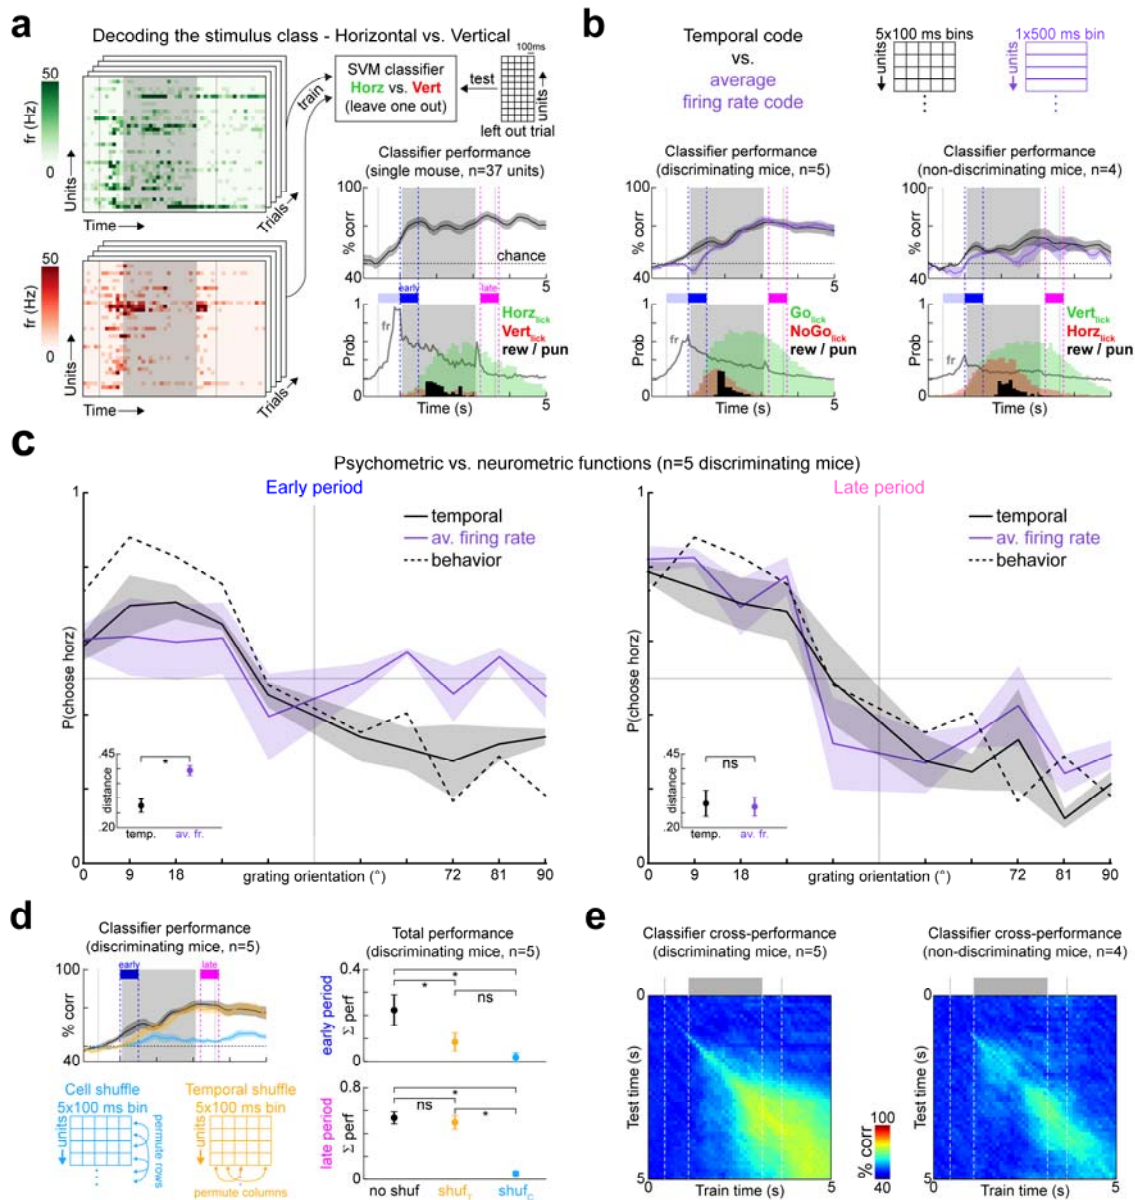

497

498

**Figure 4 | Temporal decoders reproduce psychophysical measurements and**

499

**outperform rate decoders during object search.**

500

support vector machine (SVM) classifiers were trained and tested for one example

501

mouse. Classifier performance is aligned with the licking behavior and the population

502

firing rates below. The early period is defined as the 500 ms before discriminative

503

licking (across all trials) and the late period is the same size window but after reward

504

or punishment has been given.

505 arrangements were tested on both the discriminating and the non-discriminating  
506 groups of mice: temporal (black) and average firing rate (purple). Performance,  
507 licking behavior and population firing rates are shown for the discriminating (left, n=5)  
508 and non-discriminating (right, n=4) groups of mice. **c.** Psychometric and neurometric  
509 functions for each classifier type based on the population activity in the early period  
510 (left) or the late period (right). Insets: Distances of the classifier neurometric curves  
511 from the behavior psychometric curves (early:  $p=0.0268$ , late:  $p=0.630$ , paired  
512 bootstrap resample test, see Methods). **d.** Total performance of the temporal  
513 decoders when either time (orange) or cell identity (light blue) is shuffled (early  
514 period:  $p=0.033$  no shuffle vs. time,  $p=0.004$  no shuffle vs. identity, and  $p=0.1876$  for  
515 time vs. identity, late period:  $p=0.414$  no shuffle vs. time,  $p=0.0014$  no shuffle vs.  
516 identity, and  $p=0.0056$  for time vs. identity, paired bootstrap resample test, see  
517 Methods). **e.** Classifier cross-performance when training and testing times are varied  
518 for discriminating and non-discriminating groups of mice.

519

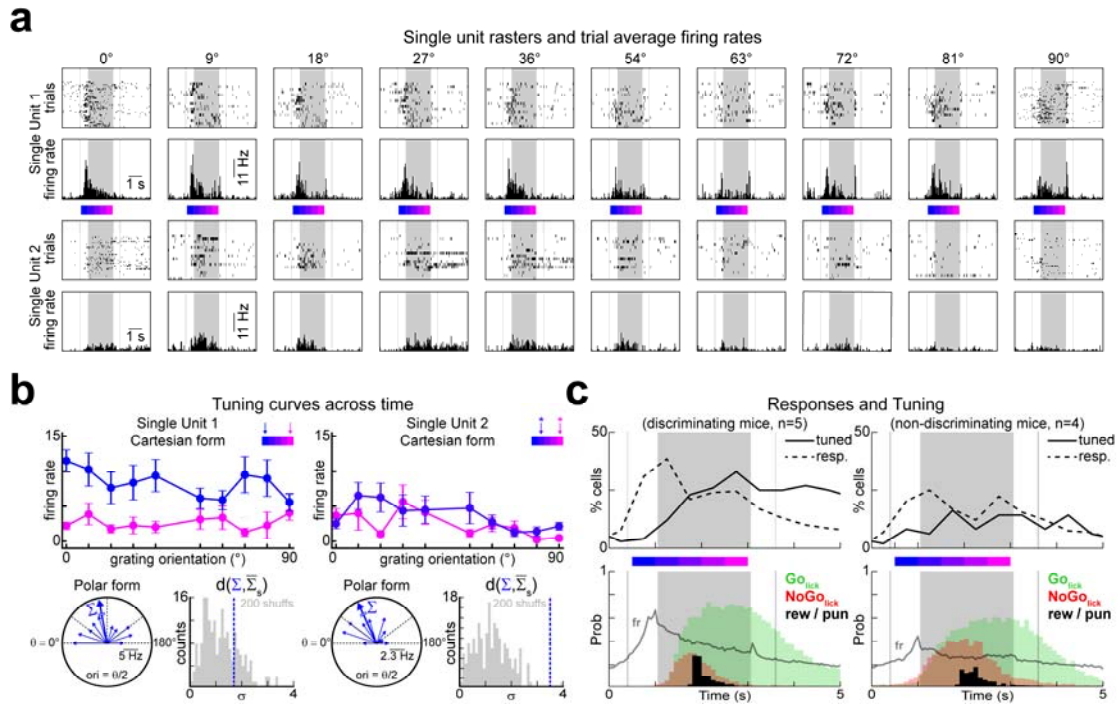

520

521 **Figure 5 | Grating orientation tuning is weak at the onset of barrel cortex**  
 522 **spiking responses but increases as licking sets in. a.** Single trial rasters and trial-  
 523 averaged PSTHs from two example single units during performance of the  
 524 psychometric Go-NoGo task. **b.** Tuning curves from 2 example single units (same  
 525 units from a) in various time windows color-coded by where the 500 ms time bin in  
 526 which the curves were computed falls with respect to early vs. late periods. **c.** The  
 527 percentage of responsive cells and orientation-tuned cells relative to trial onset.  
 528 Population firing rates and licking behavior are plotted below to serve as a reference.

529

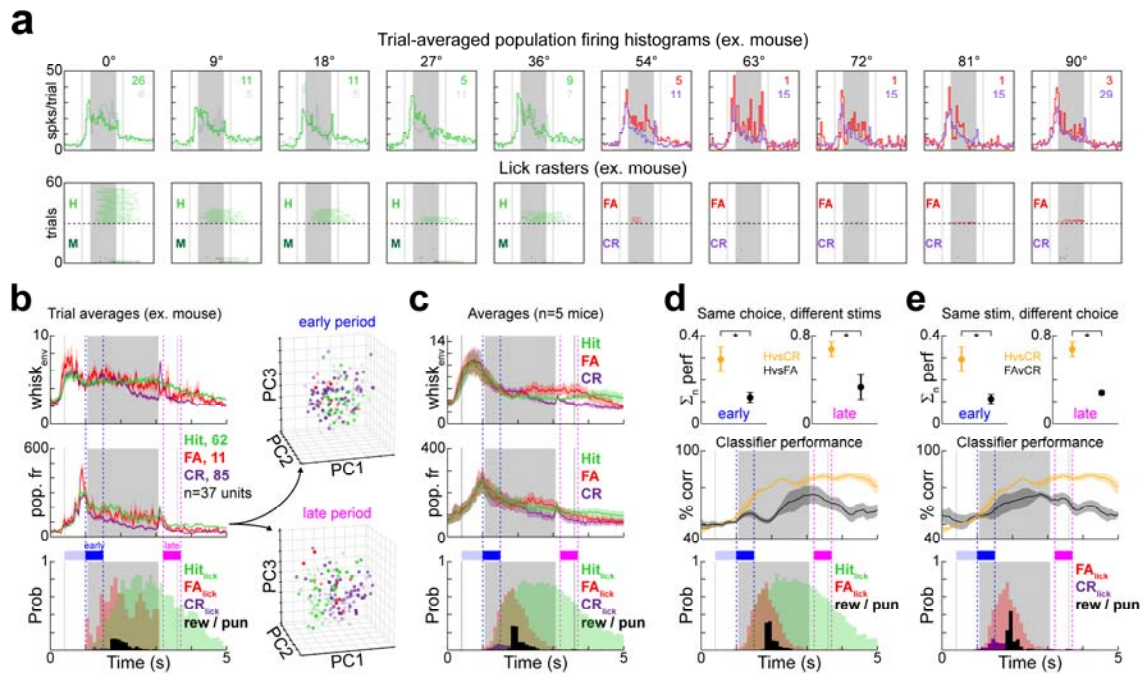

530

531 **Figure 6 | Barrel cortex activity encodes trial outcome for correct decisions on**

532 **a trial-by-trial basis controlling for licking.** **a.** Top: Trial-averaged population firing

533 rates separated by orientation and outcome (Hits, Misses, False Alarms, and Correct

534 Rejections are lime green, dark green, red, and purple respectively) Bottom: Lick

535 rasters for all trials. **b.** Left: Trial-averaged whisking envelope, population firing rate,

536 and licking behavior separated for Hits (lime green), Correct Rejections (purple), and

537 False Alarms (red) for an example mouse. Right: Population vectors projected onto

538 the first three principal components for the early period (top) and the late period

539 (bottom). **c.** Same as b for all discriminating mice (n=5). **d.** SVM classifier decoding

540 for Hits vs. False Alarms (black) and Hits vs. Correct Rejections (gold). Top: total

541 performance in the early and late periods for the different classifiers normalized to the

542 baseline before trial start ( $p=0.0214$  and  $p=0.035$ , paired bootstrap resample test),

543 Middle: Classifier performance across all time points relative to trial onset. Bottom:

544 Licking behavior for Hits and False Alarms. **e.** Same as d for False Alarms vs.

545 Correct Rejections ( $p=0.018$  and  $p=0.0134$ , paired bootstrap resample test).

## 546 **References**

- 547 1. Diamond, M. E. Texture sensation through the fingertips and the whiskers.  
548 *Current Opinion in Neurobiology* (2010). doi:10.1016/j.conb.2010.03.004
- 549 2. Maklad, A., Fritzschn, B. & Hansen, L. A. Innervation of the maxillary vibrissae in  
550 mice as revealed by anterograde and retrograde tract tracing. *Cell Tissue Res.*  
551 (2004). doi:10.1007/s00441-003-0816-z
- 552 3. Bosman, L. W. J. *et al.* Anatomical Pathways Involved in Generating and  
553 Sensing Rhythmic Whisker Movements. *Front. Integr. Neurosci.* **5**, 1–28  
554 (2011).
- 555 4. Woolsey, T. A., Dierker, M. L. & Wann, D. F. Mouse Sml cortex: qualitative and  
556 quantitative classification of Golgi impregnated barrel neurons. *Proc. Natl.*  
557 *Acad. Sci. U. S. A.* (1975). doi:10.1073/pnas.72.6.2165
- 558 5. Petersen, C. C. H. The functional organization of the barrel cortex. *Neuron*  
559 (2007). doi:10.1016/j.neuron.2007.09.017
- 560 6. Kleinfeld, D., Ahissar, E. & Diamond, M. E. Active sensation: insights from the  
561 rodent vibrissa sensorimotor system. *Current Opinion in Neurobiology* (2006).  
562 doi:10.1016/j.conb.2006.06.009
- 563 7. Estebanez, L., F  r  zou, I., Ego-Stengel, V. & Shulz, D. E. Representation of  
564 tactile scenes in the rodent barrel cortex. *Neuroscience* (2018).  
565 doi:10.1016/j.neuroscience.2017.08.039
- 566 8. O'Connor, D. H. *et al.* Vibrissa-based object localization in head-fixed mice. *J.*  
567 *Neurosci.* (2010). doi:10.1523/JNEUROSCI.3762-09.2010
- 568 9. O'Connor, D. H., Peron, S. P., Huber, D. & Svoboda, K. Neural activity in barrel  
569 cortex underlying vibrissa-based object localization in mice. *Neuron* (2010).  
570 doi:10.1016/j.neuron.2010.08.026

- 571 10. Hutson, K. A. & Masterton, R. B. The sensory contribution of a single vibrissa's  
572 cortical barrel. *J. Neurophysiol.* (1986). doi:10.1152/jn.1986.56.4.1196
- 573 11. Hong, Y. K., Lacefield, C. O., Rodgers, C. C. & Bruno, R. M. Sensation,  
574 movement and learning in the absence of barrel cortex. *Nature* (2018).  
575 doi:10.1038/s41586-018-0527-y
- 576 12. Chen, J. L., Carta, S., Soldado-Magraner, J., Schneider, B. L. & Helmchen, F.  
577 Behaviour-dependent recruitment of long-range projection neurons in  
578 somatosensory cortex. *Nature* (2013). doi:10.1038/nature12236
- 579 13. Chen, J. L. *et al.* Pathway-specific reorganization of projection neurons in  
580 somatosensory cortex during learning. *Nat. Neurosci.* (2015).  
581 doi:10.1038/nn.4046
- 582 14. Chen, J. L., Voigt, F. F., Javadzadeh, M., Krueppel, R. & Helmchen, F. Long-  
583 range population dynamics of anatomically defined neocortical networks. *Elife*  
584 (2016). doi:10.7554/eLife.14679
- 585 15. Isett, B. R., Feasel, S. H., Lane, M. A. & Feldman, D. E. Slip-Based Coding of  
586 Local Shape and Texture in Mouse S1. *Neuron* (2018).  
587 doi:10.1016/j.neuron.2017.12.021
- 588 16. Jadhav, S. P., Wolfe, J. & Feldman, D. E. Sparse temporal coding of  
589 elementary tactile features during active whisker sensation. *Nat. Neurosci.*  
590 (2009). doi:10.1038/nn.2328
- 591 17. Zuo, Y., Perkon, I. & Diamond, M. E. Whisking and whisker kinematics during a  
592 texture classification task. *Philos. Trans. R. Soc. B Biol. Sci.* (2011).  
593 doi:10.1098/rstb.2011.0161
- 594 18. Zuo, Y. & Diamond, M. E. Texture Identification by Bounded Integration of  
595 Sensory Cortical Signals. *Curr. Biol.* (2019). doi:10.1016/j.cub.2019.03.017



- 596 19. Nikbakht, N., Tafreshiha, A., Zoccolan, D. & Diamond, M. E. Supralinear and  
597 Supramodal Integration of Visual and Tactile Signals in Rats: Psychophysics  
598 and Neuronal Mechanisms. *Neuron* (2018). doi:10.1016/j.neuron.2018.01.003
- 599 20. Bathellier, B., Ushakova, L. & Rumpel, S. Discrete Neocortical Dynamics  
600 Predict Behavioral Categorization of Sounds. *Neuron* (2012).  
601 doi:10.1016/j.neuron.2012.07.008
- 602 21. Ceballo, S., Piwkowska, Z., Bourg, J., Daret, A. & Bathellier, B. Targeted  
603 Cortical Manipulation of Auditory Perception. *Neuron* (2019).  
604 doi:10.1016/j.neuron.2019.09.043
- 605 22. Harvey, M. A., Sachdev, R. N. S. & Zeigler, H. P. Cortical barrel field ablation  
606 and unconditioned whisking kinematics. *Somatosens. Mot. Res.* (2001).  
607 doi:10.1080/01421590120072213
- 608 23. Garion, L. *et al.* Texture coarseness responsive neurons and their mapping in  
609 layer 2-3 of the rat barrel cortex in vivo. *Elife* (2014). doi:10.7554/eLife.03405
- 610 24. Anjum, F., Turni, H., Mulder, P. G. H., Van Der Burg, J. & Brecht, M. Tactile  
611 guidance of prey capture in Etruscan shrews. *Proc. Natl. Acad. Sci. U. S. A.*  
612 (2006). doi:10.1073/pnas.0605573103
- 613 25. Brown, J. *et al.* Spatial integration during active tactile sensation drives  
614 elementary shape perception. *bioRxiv* (2020). doi:10.1101/2020.03.16.994145
- 615 26. Nogueira, R., Rodgers, C. C., Fusi, S. & Bruno, R. M. Sensorimotor strategies  
616 and neuronal representations of whisker-based object recognition in mouse  
617 barrel cortex. in (2019). doi:10.32470/ccn.2019.1277-0
- 618 27. Johansson, R. S. & Flanagan, J. R. Coding and use of tactile signals from the  
619 fingertips in object manipulation tasks. *Nature Reviews Neuroscience* (2009).  
620 doi:10.1038/nrn2621

- 621 28. Schroeder, J. B. & Ritt, J. T. Selection of head and whisker coordination  
622 strategies during goal-oriented active touch. *J. Neurophysiol.* (2016).  
623 doi:10.1152/jn.00465.2015
- 624 29. Ahissar, E. Temporal-Code to Rate-Code Conversion by Neuronal Phase-  
625 Locked Loops. *Neural Comput.* (1998). doi:10.1162/089976698300017683
- 626 30. Kwon, S. E., Yang, H., Minamisawa, G. & O'Connor, D. H. Sensory and  
627 decision-related activity propagate in a cortical feedback loop during touch  
628 perception. *Nat. Neurosci.* (2016). doi:10.1038/nn.4356

## 629 **Online Methods**

### 630 **Animal Care**

631 All experiments were performed in accordance with the French Ethical Committee  
632 (Direction Générale de la Recherche et de l'Innovation) and European legislation  
633 (2010/63/EU). Procedures were approved by the French Ministry of Education in  
634 Research after consultation with the ethical committee #59 (authorization number  
635 9714-2018011108392486). Mice were housed in cages in groups of 2-4 individuals  
636 with food available ad libitum on a 12/12 light-dark cycle with temperature kept at 23°  
637 C.

### 638 **Behavioral Setup**

639 Mice were trained in a custom-built behavioral setup that was interfaced using a  
640 National Instruments (NI) card (USB-6343) to control a linear stage (Newmark eTrack  
641 series) that brought the gratings within reach of the whiskers and an Arduino Uno to  
642 control stepper motors (Makeblock) for adjusting the orientation angle of the grating  
643 and a solenoid valve (LVM10R1-6B-1-Q, SMC) for delivering water rewards (5-8  $\mu$ L).  
644 Sound cues were played with loudspeakers (Labtec Spin 85 speakers). Licking  
645 signals were acquired and digitized using a capacitive sensor (Sentronic AG, SK-3-



646 18/2,5-B-VA/PTFE) before being fed into the NI card. Software to carry out the  
647 training protocols and log the licking data was coded in Matlab using the data  
648 acquisition toolbox. Code is available upon request.

#### 649 **Headpost Implantation**

650 To stabilize the animals in the behavioral apparatus, a head-fixation post was  
651 implanted along the mid-line of the skull. Mice (C57BL/6) that were 6-8 weeks old  
652 (20-26g) were anesthetized by intraperitoneal injection of a mix of ketamine (Ketasol,  
653 80 mg/kg) and medetomidine (Domitor, 1 mg/kg). Once the mice were insensitive to  
654 hindpaw pinch, they were placed on a nose clamp and their eyes were kept moist  
655 with Ocrygel (TVM Lab). Body temperature was maintained at 36° using a thermal  
656 blanket. Xylocaine was injected under the skin in the center of the skull near bregma.  
657 Fur in the surgical location was removed using Veet, and a long incision was made in  
658 the skin along the midline of the skull 10 minutes after Xylocaine injection. After being  
659 fully exposed, the dorsal surface of the skull was scratched with a scalpel to create  
660 striations. The scratched skull was then cleaned with hydrogen peroxide. A head-  
661 fixation post was glued in place along the midline using cyanoacrylate, and then the  
662 exposed skull and base of the post were covered with Super-Bond (C&B, Sun  
663 Medical Co., Ltd.). The implant and all exposed surfaces were then embedded in  
664 dental cement. After everything had solidified, the mice were injected in one of the  
665 hindlimbs with 15  $\mu$ L of atipamezole (Antisedan, Orion pharma) and transferred to a  
666 recovery cage that was placed on a heating blanket. Mice recovered for at least 1  
667 week before any further manipulation.

#### 668 **Orientation discrimination training protocol**

669 Mice were weighed every day during water deprivation periods to make sure they did  
670 not fall below 80% of pre-deprivation body mass. For two days before training, mice

671 were fully water deprived. On the first day of training, the mice were placed on the  
672 head-fixation post for 10 minutes in the dark with the lick port in reach. They were  
673 then given single water rewards (5-8  $\mu$ L) randomly until they started to lick regularly  
674 at the lick port. Once they were comfortable licking the lick port for water reward, a  
675 protocol was launched that made one reward possible every 10 seconds if the animal  
676 licked to initiate the delivery, for up to a maximum of 100 rewards. After this  
677 habituation (1-2 days, 1 hour per day), the animals were given trials only with the Go  
678 grating until they licked regularly at the correct time within single trials. The trial  
679 timeline is shown in **Fig. 1**. For the first 40 trials, rewards were given automatically 1  
680 second after the grating came into reach of the whiskers. After these free rewards,  
681 the mice had to lick in a 2 second window that started 1 second after the grating  
682 came into reach to receive the reward. The starting threshold to trigger reward was a  
683 single lick, which was then increased to as high as 4 (2-4 across all mice) licks to  
684 trigger a reward. If animals performed 3 misses in a row, the next Go trial  
685 automatically was rewarded, and this 'miss' counter was reset while the trial was still  
686 scored as a miss. Once the rewards were action-contingent within the trial  
687 framework, performance was tracked. When the animals were able to perform 70%  
688 correct across an entire training session, a NoGo stimulus was introduced the next  
689 day interleaved pseudo-randomly with the Go grating at a ratio of 3 Go trials for every  
690 1 NoGo trial. If the addition of NoGo trials and their associated punishments (white  
691 noise at 60-70 dB and time out of 5-20 seconds) did not cease reward seeking  
692 behavior, the ratios were equilibrated (50% Go 50% NoGo) on the next day of  
693 training. The first NoGo stimulus was a flat surface (a small circle of printer paper  
694 glued on a disk the same dimensions as the gratings) with no grating  
695 (**Supplementary Fig. 1**). Once the animals discriminated this flat surface from the

696 Go grating (**Supplementary Fig. 1**, performed 70% correct across 200 trials in a  
697 single day), the NoGo stimulus was changed to a grating orthogonal to the Go  
698 grating. Punishments (loudness of the white noise and length of the time out) and lick  
699 thresholds were increased if animals could not refrain from licking for NoGo gratings.  
700 After 2 days of 70% performance in discriminating orthogonal gratings, intermediate  
701 grating orientations were introduced. At first, only 4 intermediate orientations (9, 18,  
702 72, and 81°) were given, but then another 4 (27, 36, 54, and 63°) were added after  
703 performance stabilized above 70% correct. For the full psychometry, a single training  
704 session contained 40 trials for each extremity (0 and 90°) and 20 trials for each  
705 intermediate grating, for a total of 240 trials.

#### 706 **Task performance and psychophysics analysis**

707 Learning curves across trials were calculated by dividing the number of correct  
708 responses (hits + correct rejections) in the preceding 25 trials by 25. Across days the  
709 curves were stitched together and smoothed with a Gaussian kernel. If the animals  
710 ceased licking for more than 15 trials, the trials were removed from the learning  
711 curves, as blocks of inactivity of this size indicate the mouse is distracted or satiated.  
712 Discriminative licking was detected by Wilcoxon rank-sum tests on the licking  
713 histograms (100 ms bins) generated for each trial (significance for  $p < 0.01$ ) comparing  
714 horizontal trials ( $< 45^\circ$ ) with vertical trials ( $> 45^\circ$ ) at each time bin. The first bin with a  
715 significant difference was taken as the 'discrimination time'. Psychometric functions in  
716 **Fig. 1d** were taken from 2 days of task performance (480 trials). The criteria for  
717 selecting these days was that total performance was above 70% correct across the  
718 entire day and there were not too many false alarm trials at the beginning of training  
719 (indicating over-thirst) or too many miss trials at the end of training (indicating  
720 satiation).

## 721 **Cortical lesions and histology**

722 After all mice learned to discriminate horizontal and vertical gratings (n=5 mice) and  
723 some learned the full psychometric version of the task (n=2 out of the 5), they were  
724 anesthetized (1.5% isoflurane delivered with Somnosuite, Kent Scientific) and placed  
725 in a nose clamp. A thermal blanket kept body temperature above 36° C. Ocrygel  
726 (TVM Lab) was applied the eyes to keep them from drying out. The location of the C2  
727 barrel had been marked on the skull (A/P: -1.5mm, M/L: 0/3.3mm) from the headpost  
728 implantation surgery in these mice, and this mark was used as the center of a 3-4  
729 mm diameter craniotomy. Thermo-coagulation lesions were carried out with a fine  
730 tipped cauterizer, making sure not to touch the surface of the brain, but to bring the  
731 cauterizer just close enough to blacken the exposed cortical tissue containing the  
732 barrel field. The craniotomy was then covered with Kwik-Cast (World precision  
733 instruments), and then sealed with dental cement. Sham animals underwent the  
734 same surgical procedure except they did not receive thermo-coagulation lesions.  
735 After surgery and recuperation (~1 hour in a recovery cage), mice were given 250  $\mu$ L  
736 of water and returned to their home cages. The behavioral testing began again the  
737 day after surgery. When behavioral testing was complete, lesioned mice were  
738 transcardially perfused with saline followed by a 4% formaldehyde solution in 0.1 M  
739 phosphate buffer (PB). Brains were dissected and then post-fixed overnight at 4° C.  
740 After washing with phosphate-buffered saline (PBS), brains were cut into 80  $\mu$ m  
741 coronal slices. Slices were mounted and then imaged using a Nikon eclipse 90i  
742 microscope (Intensilight, Nikon) and Nikon Pan UW objectives (1x/0.04 W.D 3.2 or  
743 2x/0.06 W.D. 7.5). Slices were then manually aligned with the Paxinos mouse brain  
744 atlas and the lesioned areas were tracked along the anterior-posterior axis to make  
745 sure the covered the posterior-medial barrel field (**Supplementary Fig. 2**). Sham

746 mice were used later for electrophysiological recordings during task performance,  
747 after which their brains were treated in the same way, except they were sliced  
748 tangentially to reveal electrode locations with respect to the barrels (**Supplementary**  
749 **Fig. 3**). Electrode tracks in these preparations were visible because 1,1'-Dioctadecyl-  
750 3,3,3',3'-Tetramethylindocarbocyanine Perchlorate (DiI) was placed on the shanks  
751 before they were inserted into the brain.

### 752 **Whisker movement tracking**

753 During some sessions, high speed videos of the whisker interactions with the  
754 gratings were filmed with an infrared video camera (Baumer, 500 fps). The frames  
755 were grabbed on the same clock as the stimulus presentation to assure  
756 synchronization. For each session of whisker videos, a region of interest (ROI) was  
757 manually selected around the bases of the whiskers that were in focus. In this ROI,  
758 the centroid of the binarized whiskers was computed, and this centroid was then  
759 projected onto a line that was perpendicular to the rostral whiskers to give a single  
760 coordinate. The velocity of the centroid coordinate across frames was rectified and  
761 smoothed to give the whisking envelope. This quantifies the global rostral-caudal  
762 movement of all the whiskers. This procedure is graphically displayed in **Fig. 2c**.  
763 Normalization to whisking levels in the first 30 frames (first 60 ms of a trial) was  
764 sometimes applied to compare across mice with different levels of baseline whisking  
765 activity.

### 766 **Electrophysiological recordings during task performance**

767 On the day of the recording, mice were briefly anesthetized (30 minutes, 1%  
768 isoflurane delivered with Somnosuite, Kent Scientific) and the dental cement that was  
769 covering the craniotomies from the sham surgery (n=5 sham animals) was removed.  
770 In 4 other experiments, fresh craniotomies were drilled following the same protocols

771 described in the lesion section above (except no lesions). After durotomy, the  
772 exposed cortical surface was moistened with fresh Ringer's solution and then  
773 covered with Kwik-Cast (World precision instruments), which was secured in place  
774 with cyanoacrylate. The mice were then allowed to recover for 2-3 hours in a cage  
775 that was placed on a heating blanket. Mice were then placed in the behavioral setup  
776 and the Kwik-Cast was carefully removed, making sure not to damage the brain in  
777 the process. Multi-electrode silicon probes (A2x32 5mm-25-200-177, Neuronexus)  
778 that had been coated with Dil were then slowly lowered into the left hemisphere  
779 barrel cortex at about 2  $\mu\text{m}$  per second. Once they reached a depth of 800-1000  $\mu\text{m}$   
780 and sufficient spiking activity was seen across all channels. The preparation then  
781 stabilized for 20 minutes before the behavioral protocol was launched, with periodic  
782 water rewards given to keep the mice awake and unstressed. In 5 mice, intermediate  
783 orientations were rewarded or punished and the number of trials for each orientation  
784 followed the protocol detailed in the orientation discrimination training section. In 4  
785 mice, intermediate orientations were given as catch trials, and in these experiments,  
786 fewer intermediate orientation trials were given (90 horizontal trials, 90 vertical trials,  
787 and 5 catch trials for each of 4 intermediate orientations). Psychometric data was  
788 pooled across these 9 mice for the electrophysiological data set. For the behavior  
789 alone (**Fig. 1**), all animals followed the same protocols that are described in the  
790 orientation discrimination training section.

#### 791 **Data processing and analysis for electrophysiological recordings**

792 Extracellular signals were acquired at 20kHz with an Intan RHD2000 recording  
793 system. The raw data was median filtered to remove common mode noise from all  
794 channels and then passed into KiloSort2 for spike detection and clustering. Clusters  
795 were manually curated to pick out waveforms with physiological shapes that decay

796 with distance from a primary electrode (electrode with the largest magnitude  
797 waveform). The units that passed visual inspection and entered the analysis pipeline  
798 were both single units and multi-units depending on the refractory periods found in  
799 their autocorrelograms. Data from single and multi-units was pooled for all analyses.  
800 Trial-averaged spiking histograms were created by binning spikes in 50 ms bins (**Fig.**  
801 **3**). Normalized firing rates were computed by dividing by the baseline firing rate,  
802 which was taken as the mean firing rate across 500 ms beginning 1 second before  
803 trial start.

#### 804 **Orientation tuning and response detection**

805 Orientation tuning curves were constructed by breaking trials up into 500 ms blocks.  
806 For each unit and each 500 ms block, the total number of spikes for a stimulus of a  
807 given orientation determined the magnitude of the vector pulling in that direction in a  
808 polar coordinate system where all the orientation angles were multiplied by 2. The  
809 vector sum of these 10 (or 6) oriented vectors (0, 18, 36, 54, 72, 108, 126, 144, 162,  
810 180° or 0, 36, 72, 108, 144, 180°) was compared to the distribution of vector sums  
811 obtained by shuffling the trial labels 200 times. If the actual vector sum was outside of  
812 the sphere defined by 95% of the 200 shuffles ( $p < 0.05$ ), then the cell was called  
813 orientation tuned in that 500 ms block. False positive rates were thus kept at 5%.  
814 Cells were deemed significantly responsive if evoked firing rates were 5 standard  
815 deviations above the baseline firing rate.

#### 816 **Defining the early period and late period**

817 Significant differences in licking behavior were assessed by binning the digital lick  
818 signal counts into 100 ms bins. Then, the distributions of Go trial licks and NoGo trial  
819 licks were compared at each time point relative to trial onset using Wilcoxon rank  
820 sum tests, and the first time point in the trials that gave a significant result with

821  $p < 0.01$  is where the mouse was said to have licked discriminatively. For each mouse,  
822 the 500 ms before this time point were counted as the early period. The late period  
823 was a fixed period after reward or punishment in which the animals had stopped  
824 licking for the False Alarms but the texture was still in reach of the whiskers.

### 825 **Support vector machine (SVM) classifiers**

826 Spikes were placed into 100 ms bins to generate population vectors of various types  
827 for each trial (**Fig. 4a**). The trials were divided either by grating orientation (**Fig. 4**) or  
828 by trial outcome (**Fig. 6**). Binary non-linear SVMs were then trained using the sklearn  
829 module in python along with the leave one out protocol in the model selection  
830 subdirectory of this module. The non-linear classifiers used a gamma function with an  
831 input parameter of  $1/n_{\text{features}}$  (the 'auto' option from the sklearn documentation).  
832 For each time step in the trials (100 ms), the classifiers were retrained based on the  
833 corresponding subspaces of the population vectors just before that time step, and the  
834 performance was the percentage of all trials correctly classified. Each trial was left  
835 out only once. Principal components analysis (**Fig. 6**) on the population vectors was  
836 done for an example mouse by taking all population vectors across all time for all  
837 trials. The covariance matrix across the 185-dimensional space (37 neurons x 5 time  
838 bins) was singular value decomposed and the top 3 singular vectors were then used  
839 to visualize the data.

### 840 **Bootstrap resample test**

841 For small sample sizes ( $n=5$ ) that are common in challenging experimental conditions  
842 such as these, the most appropriate statistical test is non-parametric bootstrap  
843 resampling. Wilcoxon and Mann-Whitney tests are often inappropriately used and  
844 demand larger sample sizes ( $n > 20$ ). To carry out this test, we resampled 1000 times  
845 with replacement from the pool of  $N$  (usually 5) mice and permuted the labels of what



846 was being tested (lesion vs. sham, temporal decoders vs. average firing rate  
847 decoders, etc). When appropriate, the permutations were done while keeping the  
848 measurements paired. If the difference of the mean values obtained was  $>$  or  $<$  95%  
849 of the shuffled resampled mean differences, then the measurement was deemed  
850 significant with  $p < 0.05$ . Exact p-values are provided as averages of 5 different  
851 resamples comprised of 1000 shuffles each.
